## OBSERVATIONS

## Lower Vital Capacity Is Associated With Diabetes but Not With Metabolic Syndrome in Nonobese Japanese Men

Lower vital capacity has been reported to be a predictor of diabetes in Western countries (1–3) and has also been reported to be associated with diabetes and other metabolic risk factors in Japanese middle-aged men (4). However, there is no report on the relationship between lower vital capacity and metabolic syndrome or diabetes in nonobese subjects. We studied cross-sectional relationships among percent vital capacity (%VC) and diabetes and metabolic risk factors using medical checkup data from 2,079 men and 1,215 women who visited our Medical Checkup Center and gave signed informed consent between April and December 2008. Subjects with blood levels of high-sensitivity C-reactive protein (hs-CRP)  $\geq 10$  mg/l or without respiratory function data were excluded. The prevalence of diabetes and metabolic syndrome (defined by the revised National Cholesterol Education Program [NCEP] criteria [5] for Japanese: waist circumference  $\geq 90$  cm in men and  $\geq 80$  cm in women) was significantly higher in obese subjects (defined as BMI  $\geq 25$  kg/m<sup>2</sup>) with lower %VC ( $\leq 96\%$ ) than in those with higher %VC ( $\geq 97\%$ ). However, the

prevalence of diabetes (3.9% vs. 1.9%,  $P < 0.05$ ), but not metabolic syndrome (4.7% vs. 4.8%,  $P = 0.95$ ), was significantly higher in nonobese men with lower %VC who received no antihypertensive or antihyperlipidemic medication ( $n = 618$ , mean  $\pm$  SD age  $49.1 \pm 9.0$  years) than in those with higher %VC ( $n = 630$ , age  $50.5 \pm 8.4$  years), despite the fact that age, BMI, body fat percent, waist circumference, systolic blood pressure, and diastolic blood pressure were significantly lower in subjects with lower %VC than in those with higher %VC ( $P < 0.01$ ,  $P < 0.0001$ ,  $P < 0.01$ ,  $P < 0.05$ , and  $P < 0.05$ , respectively). The prevalence of diabetes (0.4% vs. 0.9%,  $P = 0.55$ ) or metabolic syndrome (2.2% vs. 2.5%,  $P = 0.72$ ) was not significantly different between nonobese women with lower %VC ( $n = 465$ , age  $48.2 \pm 9.2$  years) and those with higher %VC ( $n = 437$ , age  $50.4 \pm 8.5$  years), and age, BMI, body fat percent, and waist circumference were significantly lower in nonobese women with lower %VC who received no antihypertensive or antihyperlipidemic medication than in those with higher %VC ( $P < 0.001$ ,  $P < 0.0001$ ,  $P < 0.001$ , and  $P < 0.001$ , respectively). Fasting glucose, triglycerides, HDL cholesterol, hs-CRP, and white blood cell count were not significantly different between nonobese subjects with lower %VC and those with higher %VC. Thus, lower vital capacity was associated with lower BMI in nonobese Japanese men and women, and the association between lower vital capacity and diabetes in nonobese Japanese men may involve factors other than metabolic syndrome or insulin resistance.

EIJI ODA, MD  
RYU KAWAI, MD

From the Medical Checkup Center, Tachikawa Medical Center, Nagaoka, Japan.

Corresponding author: Eiji Oda, [ijie@venus.sannet.ne.jp](mailto:ijie@venus.sannet.ne.jp).

DOI: 10.2337/dc08-2316

© 2009 by the American Diabetes Association.

Readers may use this article as long as the work is properly cited, the use is educational and not for profit, and the work is not altered. See <http://creativecommons.org/licenses/by-nc-nd/3.0/> for details.

**Acknowledgments**—No potential conflicts of interest relevant to this article were reported.

### References

1. Lazarus R, Sparrow D, Weiss ST. Baseline ventilator function predicts the development of higher levels of fasting insulin and fasting insulin resistance index: the Normative Aging Study. *Eur Respir J* 1998; 12:641–645
2. Ford ES, Mannino DM. Prospective association between lung function and the incidence of diabetes: findings from the National Health and Nutrition Examination Survey Epidemiologic Follow-up Study. *Diabetes Care* 2004;27:2966–2970
3. Yeh H, Punjabi NM, Wang N, Pankow JS, Duncan BB, Brancati FL. Vital capacity as a predictor of incident type 2 diabetes: the Atherosclerosis Risk in Communities study. *Diabetes Care* 2005;28:1472–1479
4. Sakuta H, Suzuki T, Yasuda H, Ito T. Vital capacity and selected metabolic diseases in middle-aged Japanese men. *Can Respir J* 2006;13:79–82
5. Grundy SM, Cleeman JI, Daniels SR, Donato KA, Eckel RH, Franklin BA, Gordon DJ, Krauss RM, Savage PJ, Smith SC Jr, Spertus JA, Costa F. Diagnosis and management of the metabolic syndrome: an American Heart Association/National Heart, Lung, and Blood Institute Scientific Statement. *Circulation* 2005;112:2735–2752
